# Supplementary material
Source: PubMed Central journal article supplement (PMC1446979)
Supplement: jbacter_188_8_2792_v2_1.pdf [file jbacter_188_8_2792_v2_1.pdf]

Table S1. Reporters (amplicons representing genes and intergenic regions) whose expression was significantly decreased (activated by RpoS) in at least two of three biological replicates of the *G. sulfurreducens rpoS* mutant versus the wild type for cells grown with acetate as the electron donor and fumarate as electron acceptor. Results are sorted first by mainrole category, then in ascending order by Locus ID. Reporters in bold have been assigned more than one mainrole category.

| Locus ID       | Common name                                               | Mainrole                                                   | Subrole                                                                                | Mean log <sub>2</sub> Ratio | SD   | Fold Changes |
|----------------|-----------------------------------------------------------|------------------------------------------------------------|----------------------------------------------------------------------------------------|-----------------------------|------|--------------|
| GSU1835        | Glutamine synthetase, type I                              | Amino acid biosynthesis                                    | Glutamate family                                                                       | -0.75                       | 0.32 | -1.68        |
| GSU1088        | Ubiquinone biosynthesis protein aarf, putative            | Biosynthesis of cofactors, prosthetic groups, and carriers | Menaquinone and ubiquinone                                                             | -0.69                       | 0.31 | -1.61        |
| GSU0036        | Capsule biosynthesis protein, putative                    | Cell envelope                                              | Biosynthesis and degradation of murein sacculus and peptidoglycan                      | -0.68                       | 0.30 | -1.60        |
| GSU0073        | Outer membrane protein, putative                          | Cell envelope                                              | Other                                                                                  | -0.80                       | 0.19 | -1.75        |
| GSU1817        | Outer membrane lipoprotein, Slp family, putative          | Cell envelope                                              | Other                                                                                  | -1.15                       | 0.38 | -2.22        |
| GSU1961        | Glycosyl transferase, group 2 family protein              | Cell envelope                                              | Biosynthesis and degradation of surface polysaccharides and lipopolysaccharides        | -0.74                       | 0.28 | -1.67        |
| GSU1970        | Polysaccharide biosynthesis protein, putative             | Cell envelope                                              | Biosynthesis and degradation of surface polysaccharides and lipopolysaccharides        | -0.85                       | 0.24 | -1.81        |
| <b>GSU1975</b> | <b>NAD-dependent epimerase/dehydratase family protein</b> | <b>Cell envelope</b>                                       | <b>Biosynthesis and degradation of surface polysaccharides and lipopolysaccharides</b> | -0.62                       | 0.25 | -1.54        |
| GSU1983        | Polysaccharide biosynthesis protein, putative             | Cell envelope                                              | Biosynthesis and degradation of surface polysaccharides and lipopolysaccharides        | -0.64                       | 0.20 | -1.56        |
| GSU1984        | Polysaccharide chain length determinant protein, putative | Cell envelope                                              | Other                                                                                  | -0.72                       | 0.21 | -1.65        |
| GSU3462        | Lipoprotein, putative                                     | Cell envelope                                              | Other                                                                                  | -1.10                       | 0.32 | -2.14        |
| GSU0583        | Methyl-accepting chemotaxis protein                       | Cellular processes                                         | Chemotaxis and motility                                                                | -0.73                       | 0.30 | -1.66        |
| GSU1013        | Chemotaxis motb protein, putative                         | Cellular processes                                         | Chemotaxis and motility                                                                | -0.88                       | 0.26 | -1.84        |

| <b>Locus ID</b> | <b>Common name</b>                                  | <b>Mainrole</b>                 | <b>Subrole</b>                             | <b>Mean log<sub>2</sub> Ratio</b> | <b>SD</b> | <b>Fold Changes</b> |
|-----------------|-----------------------------------------------------|---------------------------------|--------------------------------------------|-----------------------------------|-----------|---------------------|
| GSU1118         | Universal stress protein family                     | Cellular processes              | Adaptations to atypical conditions         | -1.07                             | 0.34      | -2.11               |
| GSU2657         | Spore coat protein A                                | Cellular processes              | Sporulation and germination                | -0.93                             | 0.60      | -1.91               |
| GSU2794         | Large conductance mechanosensitive channel protein  | Cellular processes              | Adaptations to atypical conditions         | -0.63                             | 0.23      | -1.55               |
| GSU0067         | Carbonic anhydrase                                  | Central intermediary metabolism | Other                                      | -1.57                             | 0.26      | -2.98               |
| GSU0918         | S-adenosylmethionine synthetase family protein      | Central intermediary metabolism | Other                                      | -0.76                             | 0.23      | -1.70               |
| GSU0997         | Formamidopyrimidine-DNA glycosylase                 | DNA metabolism                  | DNA replication, recombination, and repair | -0.86                             | 0.23      | -1.82               |
| GSU2829         | Deoxyribodipyrimidine photolyase, putative          | DNA metabolism                  | DNA replication, recombination, and repair | -0.96                             | 0.46      | -1.95               |
| GSU0069         | Oxidoreductase, iron-sulfur cluster-binding subunit | Energy metabolism               | Electron transport                         | -0.95                             | 0.39      | -1.93               |
| GSU0121         | Nickel-iron hydrogenase, b-type cytochrome subunit  | Energy metabolism               | Electron transport                         | -0.91                             | 0.27      | -1.88               |
| GSU0122         | Nickel-dependent hydrogenase, large subunit         | Energy metabolism               | Electron transport                         | -1.23                             | 0.43      | -2.35               |
| GSU0123         | Nickel-dependent hydrogenase, small subunit         | Energy metabolism               | Electron transport                         | -0.99                             | 0.30      | -1.99               |
| GSU0201         | Isoquinoline 1-oxidoreductase, beta subunit         | Energy metabolism               | Fermentation                               | -1.38                             | 0.25      | -2.61               |
| GSU0219         | Cytochrome c oxidase, subunit I                     | Energy metabolism               | Electron transport                         | -0.86                             | 0.40      | -1.81               |
| GSU0222         | Cytochrome c oxidase, subunit II                    | Energy metabolism               | Electron transport                         | -0.80                             | 0.23      | -1.74               |
| GSU0342         | NADH dehydrogenase I, E subunit                     | Energy metabolism               | Electron transport                         | -0.65                             | 0.23      | -1.56               |
| GSU0350         | NADH dehydrogenase I, M subunit                     | Energy metabolism               | Electron transport                         | -0.79                             | 0.17      | -1.73               |
| GSU0357         | Cytochrome c family protein                         | Energy metabolism               | Electron transport                         | -2.67                             | 0.80      | -6.35               |
| GSU0377         | Glycine cleavage system P protein, subunit 1        | Energy metabolism               | Amino acids and amines                     | -0.69                             | 0.33      | -1.62               |
| GSU0466         | Cytochrome c551 peroxidase, MacA                    | Energy metabolism               | Electron transport                         | -2.30                             | 0.39      | -4.93               |
| GSU0674         | Prismane protein                                    | Energy metabolism               | Electron transport                         | -3.21                             | 0.51      | -9.27               |
| GSU0804         | Trp repressor binding protein wrba                  | Energy metabolism               | Electron transport                         | -1.19                             | 0.57      | -2.28               |
| GSU0911         | Iron-sulfur cluster-binding protein                 | Energy metabolism               | Electron transport                         | -0.72                             | 0.38      | -1.65               |
| GSU1024         | Cytochrome c3                                       | Energy metabolism               | Electron transport                         | -1.72                             | 0.77      | -3.28               |
| GSU1058         | Succinyl-coa synthase, beta subunit                 | Energy metabolism               | TCA cycle                                  | -0.64                             | 0.29      | -1.56               |
| GSU1059         | Succinyl-coa synthase, alpha subunit                | Energy metabolism               | TCA cycle                                  | -1.02                             | 0.30      | -2.03               |
| GSU1397         | Cytochrome c family protein, putative               | Energy metabolism               | Electron transport                         | -2.13                             | 0.41      | -4.39               |
| GSU1416         | Iron-sulfur cluster-binding protein                 | Energy metabolism               | Electron transport                         | -0.93                             | 0.26      | -1.90               |
| GSU1465         | Isocitrate dehydrogenase, NADP-                     | Energy metabolism               | TCA cycle                                  | -0.64                             | 0.31      | -1.56               |

| <b>Locus ID</b> | <b>Common name</b>                                                          | <b>Mainrole</b>          | <b>Subrole</b>                                  | <b>Mean log<sub>2</sub> Ratio</b> | <b>SD</b> | <b>Fold Changes</b> |
|-----------------|-----------------------------------------------------------------------------|--------------------------|-------------------------------------------------|-----------------------------------|-----------|---------------------|
| GSU1469         | dependent<br>Keto/oxoacid ferredoxin oxidoreductase, beta subunit           | Energy metabolism        | Fermentation                                    | -0.71                             | 0.29      | -1.64               |
| GSU1538         | Methylamine utilization protein maug, putative                              | Energy metabolism        | Amino acids and amines                          | -0.82                             | 0.36      | -1.76               |
| GSU1606         | Ribose 5-phosphate isomerase B, putative                                    | Energy metabolism        | Pentose phosphate pathway                       | -0.45                             | 0.13      | -1.36               |
| GSU1640         | Cytochrome d ubiquinol oxidase, subunit I                                   | Energy metabolism        | Electron transport                              | -0.92                             | 0.44      | -1.90               |
| GSU1641         | Cytochrome d ubiquinol oxidase, subunit II                                  | Energy metabolism        | Electron transport                              | -1.60                             | 0.67      | -3.04               |
| GSU1648         | Cytochrome c family protein                                                 | Energy metabolism        | Electron transport                              | -1.48                             | 0.48      | -2.79               |
| GSU1649         | Cytochrome b/b6                                                             | Energy metabolism        | Electron transport                              | -1.02                             | 0.33      | -2.03               |
| GSU1650         | Cytochrome b/b6 complex, iron-sulfur subunit                                | Energy metabolism        | Electron transport                              | -1.02                             | 0.49      | -2.03               |
| GSU1660         | Aconitate hydratase 2                                                       | Energy metabolism        | TCA cycle                                       | -0.78                             | 0.33      | -1.71               |
| <b>GSU1975</b>  | <b>NAD-dependent epimerase/dehydratase family protein</b>                   | <b>Energy metabolism</b> | <b>Sugars</b>                                   | -0.62                             | 0.25      | -1.54               |
| GSU2076         | Cytochrome c family protein                                                 | Energy metabolism        | Electron transport                              | -1.19                             | 0.58      | -2.28               |
| GSU2446         | 2-oxoglutarate dehydrogenase complex, E3 component, lipoamide dehydrogenase | Energy metabolism        | TCA cycle                                       | -0.63                             | 0.21      | -1.55               |
| GSU2724         | Cytochrome c family protein                                                 | Energy metabolism        | Electron transport                              | -0.81                             | 0.30      | -1.75               |
| GSU2725         | Cytochrome c family protein                                                 | Energy metabolism        | Electron transport                              | -1.16                             | 0.42      | -2.23               |
| GSU2731         | Polyheme membrane-associated cytochrome c, OmcC                             | Energy metabolism        | Anaerobic/Electron Transport                    | -2.56                             | 0.33      | -5.90               |
| GSU2732         | Cytochrome c family protein, putative                                       | Energy metabolism        | Electron transport                              | -2.46                             | 0.40      | -5.49               |
| GSU2737         | Polyheme membrane-associated cytochrome c, OmcB                             | Energy metabolism        | Anaerobic/Electron Transport                    | -1.25                             | 0.43      | -2.38               |
| GSU2738         | Cytochrome c family protein                                                 | Energy metabolism        | Electron transport                              | -2.17                             | 0.38      | -4.49               |
| GSU2743         | Cytochrome c family protein                                                 | Energy metabolism        | Electron transport                              | -1.55                             | 0.42      | -2.93               |
| GSU2811         | Cytochrome c Hsc                                                            | Energy metabolism        | Electron transport                              | -0.96                             | 0.42      | -1.95               |
| GSU2813         | Cytochrome c551 peroxidase                                                  | Energy metabolism        | Electron transport                              | -1.10                             | 0.43      | -2.15               |
| GSU2882         | Cytochrome c family protein                                                 | Energy metabolism        | Electron transport                              | -0.69                             | 0.46      | -1.62               |
| GSU3137         | Cytochrome c family protein                                                 | Energy metabolism        | Electron transport                              | -0.60                             | 0.12      | -1.52               |
| GSU3187         | Ferredoxin family protein                                                   | Energy metabolism        | Electron transport                              | -1.04                             | 0.40      | -2.06               |
| GSU3188         | Rubredoxin                                                                  | Energy metabolism        | Electron transport                              | -0.94                             | 0.49      | -1.92               |
| GSU3257         | Glycogen synthase                                                           | Energy metabolism        | Biosynthesis and degradation of polysaccharides | -0.64                             | 0.19      | -1.56               |
| GSU3274         | Cytochrome c family protein, putative                                       | Energy metabolism        | Electron transport                              | -1.20                             | 0.56      | -2.30               |

| <b>Locus ID</b> | <b>Common name</b>                                      | <b>Mainrole</b>       | <b>Subrole</b>             | <b>Mean log<sub>2</sub> Ratio</b> | <b>SD</b> | <b>Fold Changes</b> |
|-----------------|---------------------------------------------------------|-----------------------|----------------------------|-----------------------------------|-----------|---------------------|
| GSU3331         | Pyruvate kinase<br>Phosphoenolpyruvate                  | Energy metabolism     | Glycolysis/gluconeogenesis | -0.73                             | 0.22      | -1.66               |
| GSU3385         | carboxykinase                                           | Energy metabolism     | Glycolysis/gluconeogenesis | -0.61                             | 0.16      | -1.53               |
| GSU3430         | NADH dehydrogenase I, M subunit                         | Energy metabolism     | Electron transport         | -0.58                             | 0.21      | -1.50               |
| GSU0075         | Conserved hypothetical protein                          | Hypothetical proteins | Conserved                  | -0.94                             | 0.29      | -1.92               |
| GSU0186         | Conserved hypothetical protein,<br>authentic frameshift | Hypothetical proteins | Conserved                  | -0.73                             | 0.22      | -1.66               |
| GSU0218         | Conserved hypothetical protein                          | Hypothetical proteins | Conserved                  | -1.45                             | 0.32      | -2.73               |
| GSU0544         | Conserved hypothetical protein                          | Hypothetical proteins | Conserved                  | -0.77                             | 0.26      | -1.71               |
| GSU0813         | Conserved hypothetical protein                          | Hypothetical proteins | Conserved                  | -1.23                             | 0.42      | -2.35               |
| GSU0817         | Conserved hypothetical protein                          | Hypothetical proteins | Conserved                  | -0.80                             | 0.33      | -1.74               |
| GSU0824         | Conserved hypothetical protein                          | Hypothetical proteins | Conserved                  | -0.73                             | 0.22      | -1.66               |
| GSU0849         | Conserved hypothetical protein                          | Hypothetical proteins | Conserved                  | -1.75                             | 0.60      | -3.36               |
| GSU1071         | Conserved hypothetical protein                          | Hypothetical proteins | Conserved                  | -1.01                             | 0.23      | -2.01               |
| GSU1087         | Conserved hypothetical protein                          | Hypothetical proteins | Conserved                  | -0.76                             | 0.29      | -1.69               |
| GSU1167         | Conserved hypothetical protein                          | Hypothetical proteins | Conserved                  | -1.32                             | 0.25      | -2.49               |
| GSU1209         | Conserved hypothetical protein                          | Hypothetical proteins | Conserved                  | -0.71                             | 0.21      | -1.63               |
| GSU1212         | Conserved hypothetical protein                          | Hypothetical proteins | Conserved                  | -1.65                             | 0.49      | -3.14               |
| GSU1213         | Conserved hypothetical protein                          | Hypothetical proteins | Conserved                  | -1.54                             | 0.50      | -2.91               |
| GSU1642         | Conserved hypothetical protein                          | Hypothetical proteins | Conserved                  | -2.40                             | 0.52      | -5.29               |
| GSU1726         | Conserved hypothetical protein                          | Hypothetical proteins | Conserved                  | -0.78                             | 0.44      | -1.72               |
| GSU2193         | Conserved hypothetical protein                          | Hypothetical proteins | Conserved                  | -1.53                             | 0.33      | -2.89               |
| GSU2347         | Conserved hypothetical protein                          | Hypothetical proteins | Conserved                  | -1.25                             | 0.34      | -2.39               |
| GSU2353         | Conserved hypothetical protein                          | Hypothetical proteins | Conserved                  | -0.64                             | 0.12      | -1.56               |
| GSU2441         | Conserved hypothetical protein                          | Hypothetical proteins | Conserved                  | -0.66                             | 0.21      | -1.58               |
| GSU2788         | Conserved hypothetical protein                          | Hypothetical proteins | Conserved                  | -1.51                             | 0.65      | -2.85               |
| GSU2792         | Conserved hypothetical protein                          | Hypothetical proteins | Conserved                  | -1.14                             | 0.42      | -2.21               |
| GSU3139         | Conserved hypothetical protein                          | Hypothetical proteins | Conserved                  | -0.97                             | 0.24      | -1.95               |
| GSU3251         | Conserved hypothetical protein                          | Hypothetical proteins | Conserved                  | -1.06                             | 0.59      | -2.09               |

| <b>Locus ID</b> | <b>Common name</b>             | <b>Mainrole</b>       | <b>Subrole</b>                                       | <b>Mean log<sub>2</sub> Ratio</b> | <b>SD</b> | <b>Fold Changes</b> |
|-----------------|--------------------------------|-----------------------|------------------------------------------------------|-----------------------------------|-----------|---------------------|
| GSU3255         | Conserved hypothetical protein | Hypothetical proteins | Conserved                                            | -0.75                             | 0.31      | -1.68               |
| GSU3289         | Conserved hypothetical protein | Hypothetical proteins | Conserved                                            | -2.91                             | 0.35      | -7.51               |
| GSU3342         | Conserved domain protein       | Hypothetical proteins | Domain                                               | -1.92                             | 0.80      | -3.78               |
| GSU0071         | Hypothetical protein           | Hypothetical protein  | Hypothetical                                         | -0.98                             | 0.32      | -1.97               |
| GSU0077         | Hypothetical protein           | Hypothetical protein  | Hypothetical                                         | -1.34                             | 0.78      | -2.53               |
| GSU0078         | Hypothetical protein           | Hypothetical protein  | Hypothetical                                         | -1.28                             | 0.55      | -2.42               |
| GSU0539         | Hypothetical protein           | Hypothetical protein  | Hypothetical                                         | -1.32                             | 0.34      | -2.49               |
| GSU0715         | Hypothetical protein           | Hypothetical protein  | Hypothetical                                         | -1.57                             | 0.51      | -2.97               |
| GSU0716         | Hypothetical protein           | Hypothetical protein  | Hypothetical                                         | -1.11                             | 0.85      | -2.16               |
| GSU0719         | Hypothetical protein           | Hypothetical protein  | Hypothetical                                         | -1.15                             | 0.47      | -2.22               |
| GSU0790         | Hypothetical protein           | Hypothetical protein  | Hypothetical                                         | -1.70                             | 0.47      | -3.24               |
| GSU0915         | Hypothetical protein           | Hypothetical protein  | Hypothetical                                         | -0.76                             | 0.34      | -1.70               |
| GSU0968         | Hypothetical protein           | Hypothetical protein  | Hypothetical                                         | -0.81                             | 0.30      | -1.75               |
| GSU0996         | Hypothetical protein           | Hypothetical protein  | Hypothetical                                         | -1.67                             | 0.86      | -3.18               |
| GSU1160         | Hypothetical protein           | Hypothetical protein  | Hypothetical                                         | -0.75                             | 0.31      | -1.68               |
| GSU1395         | Hypothetical protein           | Hypothetical protein  | Hypothetical                                         | -1.33                             | 0.35      | -2.51               |
| GSU1396         | Hypothetical protein           | Hypothetical protein  | Hypothetical                                         | -1.07                             | 0.49      | -2.10               |
| GSU1558         | Hypothetical protein           | Hypothetical protein  | Hypothetical                                         | -1.17                             | 0.40      | -2.25               |
| GSU1857         | Hypothetical protein           | Hypothetical protein  | Hypothetical                                         | -1.01                             | 0.37      | -2.02               |
| GSU1949         | Hypothetical protein           | Hypothetical protein  | Hypothetical                                         | -0.92                             | 0.35      | -1.89               |
| GSU1969         | Hypothetical protein           | Hypothetical protein  | Hypothetical                                         | -0.77                             | 0.37      | -1.71               |
| GSU1994         | Hypothetical protein           | Hypothetical protein  | Hypothetical                                         | -0.77                             | 0.28      | -1.71               |
| GSU1995         | Hypothetical protein           | Hypothetical protein  | Hypothetical                                         | -0.75                             | 0.27      | -1.68               |
| GSU2036         | Hypothetical protein           | Hypothetical protein  | Hypothetical                                         | -0.73                             | 0.23      | -1.65               |
| GSU2037         | Hypothetical protein           | Hypothetical protein  | Hypothetical                                         | -0.84                             | 0.22      | -1.79               |
| GSU2412         | Hypothetical protein           | Hypothetical protein  | Hypothetical                                         | -0.86                             | 0.41      | -1.82               |
| GSU2726         | Hypothetical protein           | Hypothetical protein  | Hypothetical                                         | -2.25                             | 0.55      | -4.76               |
| GSU2733         | Hypothetical protein           | Hypothetical protein  | Hypothetical                                         | -2.10                             | 0.38      | -4.28               |
| GSU2739         | Hypothetical protein           | Hypothetical protein  | Hypothetical                                         | -2.10                             | 0.23      | -4.30               |
| GSU2742         | Hypothetical protein           | Hypothetical protein  | Hypothetical                                         | -1.79                             | 0.47      | -3.46               |
| GSU2793         | Hypothetical protein           | Hypothetical protein  | Hypothetical                                         | -1.42                             | 0.51      | -2.68               |
| GSU3189         | Hypothetical protein           | Hypothetical protein  | Hypothetical                                         | -0.98                             | 0.35      | -1.98               |
| GSU3271         | Hypothetical protein           | Hypothetical protein  | Hypothetical                                         | -1.86                             | 0.74      | -3.64               |
| GSU3273         | Hypothetical protein           | Hypothetical protein  | Hypothetical                                         | -1.02                             | 0.52      | -2.03               |
| GSU3311         | Hypothetical protein           | Hypothetical protein  | Hypothetical                                         | -0.59                             | 0.18      | -1.51               |
| GSU3336         | Hypothetical protein           | Hypothetical protein  | Hypothetical                                         | -0.60                             | 0.22      | -1.51               |
| GSU3341         | Hypothetical protein           | Hypothetical protein  | Hypothetical                                         | -1.89                             | 0.59      | -3.72               |
| GSU3344         | Hypothetical protein           | Hypothetical protein  | Hypothetical                                         | -1.37                             | 0.43      | -2.58               |
| GSU3345         | Hypothetical protein           | Hypothetical protein  | Hypothetical                                         | -1.20                             | 0.54      | -2.29               |
| GSU3351         | Hypothetical protein           | Hypothetical protein  | Hypothetical                                         | -1.38                             | 0.51      | -2.59               |
| GSU0080         | Protease deg q                 | Protein fate          | Degradation of proteins, peptides, and glycopeptides | -0.69                             | 0.23      | -1.61               |

| Locus ID       | Common name                                         | Mainrole                    | Subrole                                               | Mean log <sub>2</sub> Ratio | SD          | Fold Changes |
|----------------|-----------------------------------------------------|-----------------------------|-------------------------------------------------------|-----------------------------|-------------|--------------|
| GSU0928        | Peptidase, M16 family                               | Protein fate                | Degradation of proteins, peptides, and glycopeptides  | -0.61                       | 0.14        | -1.53        |
| GSU1159        | Intracellular protease, pfpi family                 | Protein fate                | Degradation of proteins, peptides, and glycopeptides  | -0.83                       | 0.31        | -1.78        |
| GSU2060        | Pmba protein, putative                              | Protein fate                | Protein modification and repair                       | -0.61                       | 0.16        | -1.53        |
| GSU2433        | ATP-dependent protease, putative                    | Protein fate                | Degradation of proteins, peptides, and glycopeptides  | -0.80                       | 0.28        | -1.74        |
| GSU3140        | Peptidase, M1 family protein                        | Protein fate                | Degradation of proteins, peptides, and glycopeptides  | -0.89                       | 0.46        | -1.86        |
| GSU3193        | ATP-dependent protease La                           | Protein fate                | Degradation of proteins, peptides, and glycopeptides  | -0.83                       | 0.22        | -1.78        |
| GSU0079        | Transcriptional regulator, Cro/CI family            | Regulatory functions        | DNA interactions                                      | -1.24                       | 0.25        | -2.36        |
| GSU0700        | Sensory box/response regulator                      | Regulatory functions        | Small molecule interactions and Two-component systems | -1.14                       | 0.56        | -2.20        |
| GSU0789        | Response regulator                                  | Regulatory functions        | Protein interactions and Two-component systems        | -1.21                       | 0.43        | -2.32        |
| GSU1117        | Response regulator                                  | Regulatory functions        | Protein interactions and Two-component systems        | -0.94                       | 0.36        | -1.91        |
| GSU1414        | Sensory box histidine kinase/response regulator     | Regulatory functions        | Small molecule interactions and Two-component systems | -0.91                       | 0.45        | -1.87        |
| GSU1654        | Response regulator, putative                        | Regulatory functions        | Protein interactions and Two-component systems        | -1.18                       | 0.31        | -2.27        |
| GSU1656        | Sensory box/response regulator                      | Regulatory functions        | Small molecule interactions and Two-component systems | -0.61                       | 0.16        | -1.52        |
| GSU1992        | Transcriptional regulator, Crp/Fnr family           | Regulatory functions        | DNA interactions                                      | -0.59                       | 0.16        | -1.51        |
| GSU2444        | Sensor histidine kinase                             | Regulatory functions        | Protein interactions                                  | -0.73                       | 0.21        | -1.65        |
| <b>GSU2964</b> | <b>Molybdenum transport regulatory protein mode</b> | <b>Regulatory functions</b> | <b>DNA interactions</b>                               | <b>-1.55</b>                | <b>0.65</b> | <b>-2.93</b> |
| GSU3252        | Sensor histidine kinase                             | Regulatory functions        | Protein interactions and Two-component systems        | -0.73                       | 0.29        | -1.65        |
| GSU0718        | Sensory box histidine kinase/response regulator     | Signal transduction         | Two-component systems                                 | -1.22                       | 0.36        | -2.33        |

| <b>Locus ID</b> | <b>Common name</b>                                                                          | <b>Mainrole</b>                | <b>Subrole</b>                      | <b>Mean log<sub>2</sub> Ratio</b> | <b>SD</b> | <b>Fold Changes</b> |
|-----------------|---------------------------------------------------------------------------------------------|--------------------------------|-------------------------------------|-----------------------------------|-----------|---------------------|
| GSU1119         | Sensor histidine kinase/response regulator                                                  | Signal transduction            | Two-component systems               | -0.83                             | 0.37      | -1.78               |
| GSU1415         | Response regulator                                                                          | Signal transduction            | Two-component systems               | -1.34                             | 0.57      | -2.53               |
| GSU1990         | Sensor histidine kinase                                                                     | Signal transduction            | Two-component systems               | -0.73                             | 0.29      | -1.66               |
| GSU3138         | Sensor histidine kinase/response regulator                                                  | Signal transduction            | Two-component systems               | -1.16                             | 0.32      | -2.24               |
| GSU0720         | Desulfoferrodoxin ferrous iron-binding domain                                               | Transport and binding proteins | Cations and iron carrying compounds | -1.72                             | 0.49      | -3.30               |
| GSU0814         | Outer membrane efflux protein, putative                                                     | Transport and binding proteins | Unknown substrate                   | -1.21                             | 0.32      | -2.32               |
| GSU0816         | ABC transporter, ATP-binding protein                                                        | Transport and binding proteins | Unknown substrate                   | -1.17                             | 0.33      | -2.26               |
| GSU1068         | Sodium/solute symporter family protein                                                      | Transport and binding proteins | Unknown substrate                   | -0.83                             | 0.20      | -1.77               |
| GSU1070         | Sodium/solute symporter family protein                                                      | Transport and binding proteins | Unknown substrate                   | -0.87                             | 0.20      | -1.82               |
| GSU1307         | Ferritin                                                                                    | Transport and binding proteins | Cations and iron carrying compounds | -1.32                             | 0.60      | -2.49               |
| GSU1557         | Mechanosensitive ion channel family protein                                                 | Transport and binding proteins | Unknown substrate                   | -1.36                             | 0.47      | -2.56               |
| GSU2005         | Branched-chain amino acid ABC transporter, periplasmic amino acid-binding protein, putative | Transport and binding proteins | Amino acids, peptides and amines    | -1.63                             | 0.37      | -3.10               |
| GSU2006         | Branched-chain amino acid ABC transporter, permease protein                                 | Transport and binding proteins | Amino acids, peptides and amines    | -1.16                             | 0.48      | -2.23               |
| GSU2007         | Branched-chain amino acid ABC transporter, permease protein                                 | Transport and binding proteins | Amino acids, peptides and amines    | -1.25                             | 0.40      | -2.38               |
| GSU2008         | Branched-chain amino acid ABC transporter, ATP-binding protein                              | Transport and binding proteins | Amino acids, peptides and amines    | -0.83                             | 0.42      | -1.77               |
| GSU2009         | Branched-chain amino acid ABC transporter, ATP-binding protein                              | Transport and binding proteins | Amino acids, peptides and amines    | -0.89                             | 0.23      | -1.85               |
| GSU2352         | Sodium/solute symporter family protein                                                      | Transport and binding proteins | Unknown substrate                   | -0.93                             | 0.23      | -1.90               |
| GSU2649         | Amino acid ABC transporter, amino acid-binding protein                                      | Transport and binding proteins | Amino acids, peptides and amines    | -2.55                             | 1.04      | -5.85               |

| Locus ID            | Common name                                         | Mainrole                              | Subrole                             | Mean log <sub>2</sub> Ratio | SD          | Fold Changes |
|---------------------|-----------------------------------------------------|---------------------------------------|-------------------------------------|-----------------------------|-------------|--------------|
| <b>GSU2964</b>      | <b>Molybdenum transport regulatory protein mode</b> | <b>Transport and binding proteins</b> | <b>Anions</b>                       | <b>-1.55</b>                | <b>0.65</b> | <b>-2.93</b> |
| GSU3268             | Ferrous iron transport protein B                    | Transport and binding proteins        | Cations and iron carrying compounds | -1.33                       | 0.44        | -2.52        |
| GSU3346             | Potassium uptake protein, Kup system                | Transport and binding proteins        | Cations and iron carrying compounds | -0.82                       | 0.33        | -1.77        |
| GSU0217             | Nitroreductase family protein                       | Unknown function                      | Enzymes of unknown specificity      | -1.36                       | 0.31        | -2.56        |
| GSU0360             | Ompa domain protein                                 | Unknown function                      | General                             | -1.56                       | 0.24        | -2.94        |
| GSU0480             | Nifu-like domain protein                            | Unknown function                      | General                             | -0.70                       | 0.16        | -1.62        |
| GSU0767             | Tia invasion determinant-related protein            | Unknown function                      | General                             | -0.98                       | 0.44        | -1.97        |
| GSU0810             | Ompa domain protein                                 | Unknown function                      | General                             | -1.46                       | 0.54        | -2.75        |
| GSU0815             | Mce-related protein                                 | Unknown function                      | General                             | -0.93                       | 0.39        | -1.91        |
| GSU1014             | Smr domain protein                                  | Unknown function                      | General                             | -0.79                       | 0.18        | -1.73        |
| GSU1394             | Laccase family protein                              | Unknown function                      | General                             | -1.76                       | 0.36        | -3.39        |
| GSU1398             | SCO1/senc family protein                            | Unknown function                      | General                             | -1.86                       | 0.52        | -3.62        |
| GSU1404             | Radical SAM domain protein                          | Unknown function                      | Enzymes of unknown specificity      | -1.07                       | 0.37        | -2.10        |
| GSU1945             | Fibronectin type III domain protein                 | Unknown function                      | General                             | -0.71                       | 0.25        | -1.63        |
| GSU1982             | General secretion pathway protein-related protein   | Unknown function                      | General                             | -0.61                       | 0.18        | -1.52        |
| GSU1986             | Glycosyl transferase domain protein                 | Unknown function                      | General                             | -0.71                       | 0.25        | -1.63        |
| GSU1991             | CAAX amino terminal protease family protein         | Unknown function                      | General                             | -0.62                       | 0.09        | -1.54        |
| GSU2010             | CBS domain protein                                  | Unknown function                      | General                             | -1.12                       | 0.34        | -2.17        |
| GSU2063             | HD domain protein                                   | Unknown function                      | General                             | -0.68                       | 0.19        | -1.60        |
| GSU2443             | Dehydrogenase complex, E1 component, alpha subunit  | Unknown function                      | Enzymes of unknown specificity      | -0.67                       | 0.25        | -1.59        |
| GSU3330             | NADH-dependent flavin oxidoreductase, Oye family    | Unknown function                      | Enzymes of unknown specificity      | -0.68                       | 0.21        | -1.61        |
| GSU3343             | Spovr-like family protein                           | Unknown function                      | General                             | -1.62                       | 0.39        | -3.06        |
| <sup>a</sup> R00118 | Null                                                |                                       |                                     | -1.51                       | 0.65        | -1.60        |
| <sup>a</sup> R04063 | Null                                                |                                       |                                     | -1.31                       | 0.46        | -2.49        |
| <sup>a</sup> R05513 | Null                                                |                                       |                                     | -0.77                       | 0.35        | -1.71        |

<sup>a</sup> Intergenic region



Table S2. Reporters (amplicons representing genes and intergenic regions) whose expression was significantly increased (repressed by RpoS) in at least two of three biological replicates of the *G. sulfurreducens rpoS* mutant versus the wild type for cells grown with acetate as the electron donor and fumarate as electron acceptor. Results are sorted first by main role category, then in ascending order by Locus ID. Reporters in bold have been assigned more than one mainrole category.

| <b>Locus ID</b> | <b>Common name</b>                                     | <b>Mainrole</b>                                            | <b>Subrole</b>                                                                  | <b>Mean<br/>log<sub>2</sub><br/>Ratio</b> | <b>SD</b> | <b>Fold<br/>Change</b> |
|-----------------|--------------------------------------------------------|------------------------------------------------------------|---------------------------------------------------------------------------------|-------------------------------------------|-----------|------------------------|
| GSU1903         | 3-isopropylmalate dehydratase, large subunit, putative | Amino acid biosynthesis                                    | Pyruvate family                                                                 | 0.61                                      | 0.14      | 1.52                   |
| GSU1917         | Undecaprenyl diphosphate synthase                      | Biosynthesis of cofactors, prosthetic groups, and carriers | Other                                                                           | 0.74                                      | 0.32      | 1.67                   |
| GSU0038         | Lipoprotein, putative                                  | Cell envelope                                              | Other                                                                           | 0.85                                      | 0.31      | 1.81                   |
| GSU0116         | Transglycosylase                                       | Cell envelope                                              | Biosynthesis and degradation of murein sacculus and peptidoglycan               | 0.65                                      | 0.19      | 1.57                   |
| GSU0757         | Lipoprotein, putative                                  | Cell envelope                                              | Other                                                                           | 1.01                                      | 0.28      | 2.02                   |
| GSU1783         | Type IV pilus biogenesis protein PilB, putative        | Cell envelope                                              | Surface structures                                                              | 0.75                                      | 0.32      | 1.68                   |
| GSU1789         | Glycosyl transferase, group 2 family protein           | Cell envelope                                              | Biosynthesis and degradation of surface polysaccharides and lipopolysaccharides | 0.78                                      | 0.19      | 1.72                   |
| GSU1851         | Glycosyl transferase, group 1 family protein           | Cell envelope                                              | Biosynthesis and degradation of surface polysaccharides and lipopolysaccharides | 0.93                                      | 0.28      | 1.90                   |

| <b>Locus ID</b> | <b>Common name</b>                                                      | <b>Mainrole</b>           | <b>Subrole</b>                                                                  | <b>Mean log<sub>2</sub> Ratio</b> | <b>SD</b>   | <b>Fold Change</b> |
|-----------------|-------------------------------------------------------------------------|---------------------------|---------------------------------------------------------------------------------|-----------------------------------|-------------|--------------------|
| GSU1854         | UDP-glucose/GDP-mannose dehydrogenase family protein                    | Cell envelope             | Biosynthesis and degradation of surface polysaccharides and lipopolysaccharides | 0.87                              | 0.42        | 1.83               |
| GSU2089         | Rod shape-determining protein MreB                                      | Cell envelope             | Biosynthesis and degradation of murein sacculus and peptidoglycan               | 0.72                              | 0.32        | 1.64               |
| GSU2244         | Glycosyl transferase, group 2 family protein                            | Cell envelope             | Biosynthesis and degradation of surface polysaccharides and lipopolysaccharides | 0.70                              | 0.23        | 1.63               |
| GSU2497         | Lipoprotein, putative                                                   | Cell envelope             | Other                                                                           | 0.74                              | 0.23        | 1.67               |
| GSU2498         | Lipoprotein, putative                                                   | Cell envelope             | Other                                                                           | 0.72                              | 0.18        | 1.65               |
| GSU0207         | Cold-shock domain family protein                                        | Cellular processes        | Adaptations to atypical conditions                                              | 0.98                              | 0.56        | 1.97               |
| <b>GSU1330</b>  | <b>Metal ion efflux outer membrane protein family protein, putative</b> | <b>Cellular processes</b> | <b>Detoxification</b>                                                           | <b>1.42</b>                       | <b>0.94</b> | <b>2.67</b>        |
| GSU1523         | Stationary-phase survival protein sure                                  | Cellular processes        | Adaptations to atypical conditions                                              | 0.60                              | 0.18        | 1.52               |
| GSU2223         | Chemotaxis protein chey                                                 | Cellular processes        | Chemotaxis and motility                                                         | 1.04                              | 0.70        | 2.05               |
| <b>GSU3206</b>  | <b>dnaK suppressor protein, putative</b>                                | <b>Cellular processes</b> | <b>Cell division</b>                                                            | <b>0.70</b>                       | <b>0.26</b> | <b>1.62</b>        |
| GSU0870         | Mutator mufT protein                                                    | DNA metabolism            | DNA replication, recombination, and repair                                      | 0.79                              | 0.24        | 1.73               |
| GSU1363         | RNA-directed DNA polymerase                                             | DNA metabolism            | Other                                                                           | 0.92                              | 0.28        | 1.90               |
| <b>GSU1521</b>  | <b>Integration host factor, alpha subunit</b>                           | <b>DNA metabolism</b>     | <b>DNA replication, recombination, and repair</b>                               | <b>0.78</b>                       | <b>0.16</b> | <b>1.71</b>        |
| GSU0364         | Cytochrome c3                                                           | Energy metabolism         | Electron transport                                                              | 0.91                              | 0.26        | 1.88               |
| GSU0782         | Nickel-dependent hydrogenase, small subunit                             | Energy metabolism         | Electron transport                                                              | 2.73                              | 0.65        | 6.62               |
| GSU0783         | Nickel-dependent hydrogenase, iron-sulfur cluster-binding protein       | Energy metabolism         | Electron transport                                                              | 2.01                              | 0.58        | 4.03               |

| <b>Locus ID</b> | <b>Common name</b>                                | <b>Mainrole</b>                              | <b>Subrole</b>     | <b>Mean<br/>log<sub>2</sub><br/>Ratio</b> | <b>SD</b> | <b>Fold<br/>Change</b> |
|-----------------|---------------------------------------------------|----------------------------------------------|--------------------|-------------------------------------------|-----------|------------------------|
| GSU0784         | Nickel-dependent hydrogenase,<br>membrane protein | Energy metabolism                            | Electron transport | 2.53                                      | 0.51      | 5.79                   |
| GSU0785         | Nickel-dependent hydrogenase, large<br>subunit    | Energy metabolism                            | Electron transport | 1.92                                      | 0.47      | 3.78                   |
| GSU1786         | Cytochrome c family protein                       | Energy metabolism                            | Electron transport | 0.64                                      | 0.14      | 1.56                   |
| GSU1787         | Cytochrome c family protein                       | Energy metabolism                            | Electron transport | 0.97                                      | 0.27      | 1.96                   |
| GSU2501         | Cytochrome c family protein                       | Energy metabolism                            | Electron transport | 0.76                                      | 0.22      | 1.69                   |
| GSU2934         | Cytochrome c family protein                       | Energy metabolism                            | Electron transport | 0.74                                      | 0.23      | 1.67                   |
| GSU1916         | Phosphatidate cytidyltransferase                  | Fatty acid and<br>phospholipid<br>metabolism | Biosynthesis       | 0.63                                      | 0.18      | 1.54                   |
| GSU0561         | Conserved domain protein                          | Hypothetical<br>proteins                     | Domain             | 1.12                                      | 0.43      | 2.18                   |
| GSU0863         | Conserved hypothetical protein                    | Hypothetical<br>proteins                     | Conserved          | 0.68                                      | 0.30      | 1.61                   |
| GSU1598         | Conserved hypothetical protein                    | Hypothetical<br>proteins                     | Conserved          | 0.93                                      | 0.34      | 1.91                   |
| GSU1771         | Conserved domain protein                          | Hypothetical<br>proteins                     | Domain             | 0.62                                      | 0.36      | 1.54                   |
| GSU1889         | Conserved hypothetical protein                    | Hypothetical<br>proteins                     | Conserved          | 0.80                                      | 0.31      | 1.74                   |
| GSU0943         | Hypothetical protein                              | Hypothetical<br>protein                      | Hypothetical       | 0.68                                      | 0.20      | 1.60                   |
| GSU0965         | Hypothetical protein                              | Hypothetical<br>protein                      | Hypothetical       | 0.71                                      | 0.30      | 1.63                   |
| GSU1333         | Hypothetical protein                              | Hypothetical<br>protein                      | Hypothetical       | 1.51                                      | 1.08      | 2.84                   |
| GSU1339         | Hypothetical protein                              | Hypothetical<br>protein                      | Hypothetical       | 1.27                                      | 0.64      | 2.42                   |
| GSU2110         | Hypothetical protein                              | Hypothetical<br>protein                      | Hypothetical       | 0.66                                      | 0.23      | 1.58                   |
| GSU2374         | Hypothetical protein                              | Hypothetical<br>protein                      | Hypothetical       | 0.61                                      | 0.23      | 1.53                   |
| GSU2377         | Hypothetical protein                              | Hypothetical<br>protein                      | Hypothetical       | 0.73                                      | 0.24      | 1.65                   |
| GSU2499         | Hypothetical protein                              | Hypothetical<br>protein                      | Hypothetical       | 0.80                                      | 0.26      | 1.75                   |
| GSU2500         | Hypothetical protein                              | Hypothetical<br>protein                      | Hypothetical       | 1.06                                      | 0.25      | 2.09                   |
| GSU2780         | Hypothetical protein                              | Hypothetical<br>protein                      | Hypothetical       | 1.37                                      | 0.68      | 2.58                   |
| GSU2971         | Hypothetical protein                              | Hypothetical<br>protein                      | Hypothetical       | 0.71                                      | 0.28      | 1.64                   |
| GSU2972         | Hypothetical protein                              | Hypothetical<br>protein                      | Hypothetical       | 0.69                                      | 0.19      | 1.61                   |

| <b>Locus ID</b> | <b>Common name</b>                                   | <b>Mainrole</b>                               | <b>Subrole</b>                                                                      | <b>Mean<br/>log<sub>2</sub><br/>Ratio</b> | <b>SD</b> | <b>Fold<br/>Change</b> |
|-----------------|------------------------------------------------------|-----------------------------------------------|-------------------------------------------------------------------------------------|-------------------------------------------|-----------|------------------------|
| GSU3402         | Hypothetical protein                                 | Hypothetical protein                          | Hypothetical                                                                        | 0.95                                      | 0.28      | 1.93                   |
| GSU3403         | Hypothetical protein                                 | Hypothetical protein                          | Hypothetical                                                                        | 2.33                                      | 0.64      | 5.04                   |
| GSU1710         | Integrative genetic element Gsu5, integrase          | Mobile and extrachromosomal element functions | Prophage functions                                                                  | 0.72                                      | 0.26      | 1.65                   |
| GSU2471         | Group II intron, maturase                            | Mobile and extrachromosomal element functions | Transposon functions                                                                | 0.67                                      | 0.18      | 1.59                   |
| GSU0538         | Heat shock protein, Hsp20 family                     | Protein fate                                  | Protein folding and stabilization                                                   | 0.64                                      | 0.23      | 1.55                   |
| GSU0786         | Hydrogenase maturation protease                      | Protein fate                                  | Protein modification and repair                                                     | 1.19                                      | 0.59      | 2.29                   |
| GSU1791         | ATP-dependent Clp protease, ATP-binding subunit clpx | Protein fate                                  | Degradation of proteins, peptides, and glycopeptides                                | 0.64                                      | 0.29      | 1.56                   |
| GSU1792         | ATP-dependent Clp protease, proteolytic subunit ClpP | Protein fate                                  | Degradation of proteins, peptides, and glycopeptides                                | 0.86                                      | 0.30      | 1.82                   |
| GSU1793         | Trigger factor                                       | Protein fate                                  | Protein folding and stabilization and Protein and peptide secretion and trafficking | 0.80                                      | 0.27      | 1.74                   |
| GSU2408         | Heat shock protein, Hsp20 family                     | Protein fate                                  | Protein folding and stabilization                                                   | 1.04                                      | 0.41      | 2.06                   |
| GSU2410         | Heat shock protein, Hsp20 family                     | Protein fate                                  | Protein folding and stabilization                                                   | 0.86                                      | 0.25      | 1.81                   |
| GSU2835         | Methionine aminopeptidase, type I                    | Protein fate                                  | Protein modification and repair                                                     | 0.85                                      | 0.18      | 1.80                   |
| GSU0037         | Seryl-tRNA synthetase                                | Protein synthesis                             | tRNA aminoacylation                                                                 | 0.58                                      | 0.27      | 1.50                   |

| <b>Locus ID</b> | <b>Common name</b>                  | <b>Mainrole</b>   | <b>Subrole</b>                                 | <b>Mean<br/>log<sub>2</sub><br/>Ratio</b> | <b>SD</b> | <b>Fold<br/>Change</b> |
|-----------------|-------------------------------------|-------------------|------------------------------------------------|-------------------------------------------|-----------|------------------------|
| GSU0138         | Peptide chain release factor 3      | Protein synthesis | Translation factors                            | 0.62                                      | 0.20      | 1.54                   |
| GSU0665         | Ribosomal protein S6                | Protein synthesis | Ribosomal proteins: synthesis and modification | 0.89                                      | 0.26      | 1.85                   |
| GSU0906         | Ribosomal protein S21               | Protein synthesis | Ribosomal proteins: synthesis and modification | 0.61                                      | 0.16      | 1.53                   |
| GSU1515         | Threonyl-tRNA synthetase            | Protein synthesis | tRNA aminoacylation                            | 0.77                                      | 0.21      | 1.70                   |
| GSU1516         | Translation initiation factor IF-3  | Protein synthesis | Translation factors                            | 0.90                                      | 0.42      | 1.87                   |
| GSU1517         | Ribosomal protein L35               | Protein synthesis | Ribosomal proteins: synthesis and modification | 0.90                                      | 0.13      | 1.86                   |
| GSU1518         | Ribosomal protein L20               | Protein synthesis | Ribosomal proteins: synthesis and modification | 0.79                                      | 0.28      | 1.73                   |
| GSU1810         | tRNA(Ile)-lysidine synthetase       | Protein synthesis | tRNA and rRNA base modification                | 1.04                                      | 0.49      | 2.06                   |
| GSU1886         | Ribosomal subunit interface protein | Protein synthesis | Translation factors                            | 0.78                                      | 0.25      | 1.71                   |
| GSU2234         | Ribosomal protein L28               | Protein synthesis | Ribosomal proteins: synthesis and modification | 0.72                                      | 0.32      | 1.65                   |
| GSU2619         | Queuine tRNA-ribosyltransferase     | Protein synthesis | tRNA and rRNA base modification                | 0.61                                      | 0.19      | 1.53                   |
| GSU2847         | Ribosomal protein L14               | Protein synthesis | Ribosomal proteins: synthesis and modification | 0.62                                      | 0.21      | 1.54                   |
| GSU2875         | Ribosomal protein S9                | Protein synthesis | Ribosomal proteins: synthesis and modification | 0.61                                      | 0.13      | 1.53                   |
| GSU3093         | Ribosomal protein S21               | Protein synthesis | Ribosomal proteins: synthesis and modification | 0.93                                      | 0.52      | 1.91                   |

| <b>Locus ID</b> | <b>Common name</b>                                                      | <b>Mainrole</b>                                    | <b>Subrole</b>                                 | <b>Mean log<sub>2</sub> Ratio</b> | <b>SD</b> | <b>Fold Change</b> |
|-----------------|-------------------------------------------------------------------------|----------------------------------------------------|------------------------------------------------|-----------------------------------|-----------|--------------------|
| GSU3235         | Ribosomal protein L27                                                   | Protein synthesis                                  | Ribosomal proteins: synthesis and modification | 0.64                              | 0.11      | 1.55               |
| GSU1110         | Nucleoside diphosphate kinase                                           | Purines, pyrimidines, nucleosides, and nucleotides | Nucleotide and nucleoside interconversions     | 0.77                              | 0.28      | 1.70               |
| GSU0031         | Heat-inducible transcription repressor hrca                             | Regulatory functions                               | DNA interactions<br>Protein interactions       | 0.84                              | 0.16      | 1.79               |
| GSU0475         | Sensory box histidine kinase                                            | Regulatory functions                               | and Two-component systems                      | 0.95                              | 0.34      | 1.93               |
| <b>GSU1521</b>  | <b>Integration host factor, alpha subunit</b>                           | <b>Regulatory functions</b>                        | <b>Other</b>                                   | 0.78                              | 0.16      | 1.71               |
| GSU1522         | Transcriptional regulator, putative                                     | Regulatory functions                               | Other                                          | 0.63                              | 0.16      | 1.55               |
| GSU2540         | Transcriptional regulator, Cro/CI family                                | Regulatory functions                               | DNA interactions                               | 0.73                              | 0.21      | 1.65               |
| <b>GSU3206</b>  | <b>dnaK suppressor protein, putative</b>                                | <b>Regulatory functions</b>                        | <b>DNA interactions</b>                        | 0.70                              | 0.26      | 1.62               |
| GSU1277         | Transcription elongation factor grea                                    | Transcription                                      | Transcription factors                          | 0.75                              | 0.20      | 1.68               |
| GSU1589         | Ribosome-binding factor A                                               | Transcription                                      | RNA processing                                 | 0.64                              | 0.26      | 1.56               |
| <b>GSU1330</b>  | <b>Metal ion efflux outer membrane protein family protein, putative</b> | <b>Transport and binding proteins</b>              | <b>Cations and iron carrying compounds</b>     | 1.42                              | 0.94      | 2.67               |
| GSU1622         | L-lactate permease                                                      | Transport and binding proteins                     | Carbohydrates, organic alcohols, and acids     | 0.74                              | 0.31      | 1.67               |
| GSU2697         | Multidrug resistance protein                                            | Transport and binding proteins                     | Other                                          | 0.78                              | 0.28      | 1.72               |
| GSU3391         | Branched-chain amino acid ABC transporter, ATP-binding protein          | Transport and binding proteins                     | Amino acids, peptides and amines               | 0.62                              | 0.14      | 1.54               |
| GSU3392         | Branched-chain amino acid ABC transporter, ATP-binding protein          | Transport and binding proteins                     | Amino acids, peptides and amines               | 0.65                              | 0.12      | 1.57               |

| <b>Locus ID</b> | <b>Common name</b>                                                                          | <b>Mainrole</b>                | <b>Subrole</b>                   | <b>Mean<br/>log<sub>2</sub><br/>Ratio</b> | <b>SD</b> | <b>Fold<br/>Change</b> |
|-----------------|---------------------------------------------------------------------------------------------|--------------------------------|----------------------------------|-------------------------------------------|-----------|------------------------|
| GSU3401         | Branched-chain amino acid ABC transporter, periplasmic amino acid-binding protein, putative | Transport and binding proteins | Amino acids, peptides and amines | 2.47                                      | 0.44      | 5.53                   |
| GSU3404         | Amino acid ABC transporter, ATP-binding protein                                             | Transport and binding proteins | Amino acids, peptides and amines | 1.77                                      | 0.49      | 3.42                   |
| GSU0065         | Cytidine/deoxycytidylate deaminase family protein                                           | Unknown function               | Enzymes of unknown specificity   | 0.57                                      | 0.12      | 1.50                   |
| GSU0455         | Rare lipoprotein A domain protein                                                           | Unknown function               | General                          | 0.87                                      | 0.19      | 1.82                   |
| GSU1136         | 5-formyltetrahydrofolate cyclo-ligase family protein                                        | Unknown function               | General                          | 0.73                                      | 0.16      | 1.66                   |
| GSU1580         | ErfK/YbiS/YcfS/YnhG family protein                                                          | Unknown function               | General                          | 0.72                                      | 0.16      | 1.65                   |
| GSU1788         | NHL repeat domain protein                                                                   | Unknown function               | General                          | 1.24                                      | 0.39      | 2.36                   |
| GSU1794         | HAM1 protein                                                                                | Unknown function               | General                          | 1.83                                      | 0.28      | 3.56                   |
| GSU2493         | NHL repeat domain protein                                                                   | Unknown function               | General                          | 0.63                                      | 0.19      | 1.55                   |
| GSU2505         | NHL repeat domain protein                                                                   | Unknown function               | General                          | 1.06                                      | 0.37      | 2.09                   |
| GSU3078         | mraZ protein, putative                                                                      | Unknown function               | General                          | 0.80                                      | 0.20      | 1.74                   |

Table S3. Significant GO terms and TIGR biological role categories from the EASE analysis of down-regulated reporters during growth with fumarate as electron acceptor

| <b><u>System</u></b>  | <b><u>Gene Category</u></b>                                                  | <b><u>Probability</u></b> |
|-----------------------|------------------------------------------------------------------------------|---------------------------|
| GO Biological Process | Electron transport                                                           | 1.7 E-09                  |
| TIGR Role             | Energy Metabolism, electron transport                                        | 2.5 E-09                  |
| GO Molecular Function | Electron transporter activity                                                | 3.5 E-06                  |
| GO Molecular Function | Transporter activity                                                         | 5.7 E-05                  |
| GO Biological Process | Tricarboxylic acid (TCA) cycle                                               | 8.2 E-04                  |
| GO Biological Process | Main pathways of carbohydrate metabolism                                     | 8.3 E -04                 |
| TIGR Role             | Energy Metabolism, TCA cycle                                                 | 1.1 E-03                  |
| GO Molecular Function | Branched-chain aliphatic amino acid transporter activity                     | 1.1 E-03                  |
| GO Biological Process | Branched-chain aliphatic amino acid transport                                | 1.6 E-03                  |
| GO Molecular Function | Solute/sodium symporter activity                                             | 1.8 E-03                  |
| GO Biological Process | Carboxylic acid transport                                                    | 1.9 E-03                  |
| GO Biological Process | Organic acid transport                                                       | 1.9 E-03                  |
| GO Molecular Function | Pyruvate kinase activity                                                     | 3.4 E-03                  |
| GO Molecular Function | Cytochrome c peroxidase activity                                             | 3.4 E-03                  |
| GO Molecular Function | Oxidoreductase activity/acting on diphenols and related substances as donors | 3.4 E-03                  |
| GO Biological Process | Anaerobic electron transport                                                 | 3.4 E-03                  |
| GO Molecular Function | Succinate-CoA ligase (ADP-forming) activity                                  | 3.4 E-03                  |
| GO Molecular Function | Succinate-CoA ligase activity                                                | 3.4 E-03                  |
| GO Molecular Function | Solute/cation symporter activity                                             | 3.4 E-03                  |
| GO Molecular Function | Symporter activity                                                           | 3.4 E-03                  |
| GO Biological Process | Amino acid transport                                                         | 3.8E-03                   |
| GO Biological Process | Amine/polyamine transport                                                    | 4.6 E-03                  |
| GO Biological Process | Energy derivation by oxidation of organic compounds                          | 4.8 E-03                  |
| GO Biological Process | Energy pathways                                                              | 4.8 E-03                  |
| GO Molecular Function | Organic acid transporter activity                                            | 7.8 E-03                  |
| GO Molecular Function | Carboxylic acid transporter activity                                         | 7.8 E-03                  |
| TIGR Role             | Transport and binding proteins, amino acids, peptides and amines             | 8.6 E-03                  |
| GO Molecular Function | CoA-ligase activity                                                          | 9.7 E-03                  |
| GO Molecular Function | Acid-thiol ligase activity                                                   | 9.7 E-03                  |



Table S4. Significant GO terms and TIGR biological role categories from the EASE analysis of up-regulated reporters during growth with fumarate as electron acceptor

| <b><u>System</u></b>   | <b><u>Gene Category</u></b>                   | <b><u>Probability</u></b> |
|------------------------|-----------------------------------------------|---------------------------|
| GO Biological Process  | Protein metabolism                            | 6.5 E-08                  |
| GO Biological Process  | Protein biosynthesis                          | 3.6 E-06                  |
| GO Biological Process  | Macromolecule biosynthesis                    | 3.6 E-06                  |
| GO Biological Process  | Cell organization and biogenesis              | 6.6 E-06                  |
| GO Molecular Function  | Structural constituent of ribosome            | 7.3 E-06                  |
| GO Biological Process  | Ribosome biogenesis                           | 8.8 E-06                  |
| TIGR Role              | Protein synthesis, synthesis and modification | 1.2 E-05                  |
| GO Biological Process  | Ribosome biogenesis and assembly              | 1.5 E-05                  |
| GO Biological Process  | Cytoplasm organization and biogenesis         | 1.7 E-05                  |
| GO Molecular Function  | Heat shock proteins activity                  | 1.4 E-04                  |
| GO Molecular Function  | Structural molecule activity                  | 1.7 E-04                  |
| GO Molecular Component | Ribosome                                      | 2.2 E-04                  |
| GO Molecular Component | Ribonucleoprotein complex                     | 2.2 E-04                  |
| GO Molecular Function  | Chaperone activity                            | 2.4 E-04                  |
| GO Molecular Component | Intracellular                                 | 8.1 E-04                  |
| GO Molecular Component | Cytosolic ribosome (sensu Bacteria)           | 8.9 E-04                  |
| GO Molecular Component | Cytosol                                       | 8.9 E-04                  |

Table S5. Reporters (amplicons representing genes and intergenic regions) whose expression was significantly decreased (activated by RpoS) in each biological replicate of the *G. sulfurreducens rpoS* mutant versus the wild type for cells grown with acetate as the electron donor and Fe(III) as electron acceptor. Results are sorted first by mainrole category, then in ascending order by Locus ID. Reporters in bold have been assigned more than one mainrole category.

| Locus ID       | Common name                                               | Mainrole                                                   | Subrole                                                                                | Mean log <sub>2</sub> Ratio | SD          | Fold Change  |
|----------------|-----------------------------------------------------------|------------------------------------------------------------|----------------------------------------------------------------------------------------|-----------------------------|-------------|--------------|
| GSU3194        | Thiamine monophosphate kinase                             | Biosynthesis of cofactors, prosthetic groups, and carriers | Thiamine                                                                               | -1.33                       | 0.36        | -2.52        |
| GSU0727        | Lipoprotein, putative                                     | Cell envelope                                              | Other                                                                                  | -1.01                       | 0.15        | -2.01        |
| GSU1817        | Outer membrane lipoprotein, Slp family, putative          | Cell envelope                                              | Other                                                                                  | -1.03                       | 0.28        | -2.05        |
| GSU1970        | Polysaccharide biosynthesis protein, putative             | Cell envelope                                              | Biosynthesis and degradation of surface polysaccharides and lipopolysaccharides        | -1.35                       | 0.31        | -2.55        |
| <b>GSU1975</b> | <b>NAD-dependent epimerase/dehydratase family protein</b> | <b>Cell envelope</b>                                       | <b>Biosynthesis and degradation of surface polysaccharides and lipopolysaccharides</b> | <b>-1.12</b>                | <b>0.46</b> | <b>-2.17</b> |
| GSU1983        | Polysaccharide biosynthesis protein, putative             | Cell envelope                                              | Biosynthesis and degradation of surface polysaccharides and lipopolysaccharides        | -0.95                       | 0.42        | -1.93        |
| GSU2584        | Lipoprotein, putative                                     | Cell envelope                                              | Other                                                                                  | -1.18                       | 0.50        | -2.27        |
| GSU2633        | Lipoprotein, putative                                     | Cell envelope                                              | Other                                                                                  | -1.74                       | 0.46        | -3.35        |
| GSU0726        | Chemotaxis protein ched, putative                         | Cellular processes                                         | Chemotaxis and motility                                                                | -1.85                       | 0.77        | -3.60        |
| GSU0067        | Carbonic anhydrase                                        | Central intermediary metabolism                            | Other                                                                                  | -1.97                       | 0.60        | -3.92        |

| Locus ID       | Common name                                               | Mainrole                 | Subrole                                    | Mean log <sub>2</sub> Ratio | SD          | Fold Change  |
|----------------|-----------------------------------------------------------|--------------------------|--------------------------------------------|-----------------------------|-------------|--------------|
| GSU0997        | Formamidopyrimidine-DNA glycosylase                       | DNA metabolism           | DNA replication, recombination, and repair | -1.43                       | 0.37        | -2.70        |
| GSU2829        | Deoxyribodipyrimidine photolyase, putative                | DNA metabolism           | DNA replication, recombination, and repair | -1.03                       | 0.20        | -2.04        |
| GSU0201        | Isoquinoline 1-oxidoreductase, beta subunit               | Energy metabolism        | Fermentation                               | -1.62                       | 0.63        | -3.08        |
| GSU0219        | Cytochrome c oxidase, subunit I                           | Energy metabolism        | Electron transport                         | -1.35                       | 0.35        | -2.54        |
| GSU0222        | Cytochrome c oxidase, subunit II                          | Energy metabolism        | Electron transport                         | -2.74                       | 0.16        | -6.67        |
| GSU0357        | Cytochrome c family protein                               | Energy metabolism        | Electron transport                         | -1.67                       | 0.77        | -3.19        |
| GSU0466        | Cytochrome c551 peroxidase, MacA                          | Energy metabolism        | Electron transport                         | -2.00                       | 0.39        | -4.01        |
| GSU0674        | Prismane protein                                          | Energy metabolism        | Electron transport                         | -1.82                       | 1.46        | -3.53        |
| GSU0803        | Phosphoenolpyruvate synthase                              | Energy metabolism        | Glycolysis/gluconeogenesis                 | -1.45                       | 0.43        | -2.74        |
| GSU0843        | NADH oxidase, putative                                    | Energy metabolism        | Electron transport                         | -1.13                       | 0.17        | -2.19        |
| GSU0845        | Rieske 2Fe-2S family protein                              | Energy metabolism        | Electron transport                         | -0.95                       | 0.19        | -1.93        |
| GSU0846        | Aconitate hydratase 1                                     | Energy metabolism        | TCA cycle                                  | -1.32                       | 0.21        | -2.50        |
| GSU0911        | Iron-sulfur cluster-binding protein                       | Energy metabolism        | Electron transport                         | -1.11                       | 0.31        | -2.15        |
| GSU1024        | Cytochrome c3                                             | Energy metabolism        | Electron transport                         | -1.66                       | 0.47        | -3.16        |
| GSU1058        | Succinyl-coa synthase, beta subunit                       | Energy metabolism        | TCA cycle                                  | -1.56                       | 0.36        | -2.94        |
| GSU1059        | Succinyl-coa synthase, alpha subunit                      | Energy metabolism        | TCA cycle                                  | -1.63                       | 0.40        | -3.10        |
| GSU1397        | Cytochrome c family protein, putative                     | Energy metabolism        | Electron transport                         | -2.62                       | 0.52        | -6.15        |
| GSU1538        | Methylamine utilization protein maug, putative            | Energy metabolism        | Amino acids and amines                     | -3.09                       | 0.75        | -8.53        |
| GSU1648        | Cytochrome c family protein                               | Energy metabolism        | Electron transport                         | -1.37                       | 0.23        | -2.58        |
| GSU1649        | Cytochrome b/b6                                           | Energy metabolism        | Electron transport                         | -1.57                       | 0.52        | -2.96        |
| GSU1650        | Cytochrome b/b6 complex, iron-sulfur subunit              | Energy metabolism        | Electron transport                         | -0.91                       | 0.35        | -1.87        |
| GSU2737        | Polyheme                                                  |                          |                                            |                             |             |              |
| <b>GSU1975</b> | <b>NAD-dependent epimerase/dehydratase family protein</b> | <b>Energy metabolism</b> | <b>Sugars</b>                              | <b>-1.12</b>                | <b>0.46</b> | <b>-2.17</b> |
| GSU2445        | Aconitate hydratase, putative                             | Energy metabolism        | TCA cycle                                  | -1.56                       | 0.38        | -2.96        |
| GSU2449        | 2-oxoglutarate dehydrogenase, E1 component                | Energy metabolism        | TCA cycle                                  | -1.05                       | 0.22        | -2.06        |
| GSU2725        | Cytochrome c family protein                               | Energy metabolism        | Electron transport                         | -1.69                       | 0.32        | -3.23        |

| <b>Locus ID</b> | <b>Common name</b>                                   | <b>Mainrole</b>       | <b>Subrole</b>     | <b>Mean log<sub>2</sub> Ratio</b> | <b>SD</b> | <b>Fold Change</b> |
|-----------------|------------------------------------------------------|-----------------------|--------------------|-----------------------------------|-----------|--------------------|
| GSU2731         | polyheme membrane-associated cytochrome c, OmcC      | Energy metabolism     | Electron transport | -3.75                             | 0.15      | -13.5              |
| GSU2732         | Cytochrome c family protein                          | Energy metabolism     | Electron transport | -2.23                             | 0.34      | -4.68              |
| GSU2738         | Cytochrome c family protein                          | Energy metabolism     | Electron transport | -2.02                             | 0.39      | -4.05              |
| GSU2743         | Cytochrome c family protein                          | Energy metabolism     | Electron transport | -1.79                             | 0.61      | -3.45              |
| GSU2811         | Cytochrome c Hsc                                     | Energy metabolism     | Electron transport | -1.51                             | 0.34      | -2.86              |
| GSU2812         | Glutaredoxin family protein                          | Energy metabolism     | Electron transport | -1.11                             | 0.31      | -2.15              |
| GSU2813         | Cytochrome c551 peroxidase                           | Energy metabolism     | Electron transport | -1.59                             | 0.31      | -3.02              |
| GSU3137         | Cytochrome c family protein                          | Energy metabolism     | Electron transport | -0.69                             | 0.15      | -1.62              |
| GSU3187         | Ferredoxin family protein                            | Energy metabolism     | Electron transport | -0.88                             | 0.36      | -1.85              |
| GSU3254         | Phosphoglucomutase/phosphomannomutase family protein | Energy metabolism     | Sugars             | -1.13                             | 0.41      | -2.19              |
| GSU0202         | Conserved hypothetical protein                       | Hypothetical proteins | Conserved          | -1.45                             | 0.57      | -2.74              |
| GSU0218         | Conserved hypothetical protein                       | Hypothetical proteins | Conserved          | -1.64                             | 0.44      | -3.11              |
| GSU0478         | Conserved hypothetical protein                       | Hypothetical proteins | Conserved          | -0.87                             | 0.18      | -1.82              |
| GSU0813         | Conserved hypothetical protein                       | Hypothetical proteins | Conserved          | -1.08                             | 0.36      | -2.12              |
| GSU0817         | Conserved hypothetical protein                       | Hypothetical proteins | Conserved          | -0.77                             | 0.19      | -1.70              |
| GSU0849         | Conserved hypothetical protein                       | Hypothetical proteins | Conserved          | -1.39                             | 0.39      | -2.62              |
| GSU0982         | Conserved hypothetical protein                       | Hypothetical proteins | Conserved          | -0.68                             | 0.17      | -1.61              |
| GSU1087         | Conserved hypothetical protein                       | Hypothetical proteins | Conserved          | -0.65                             | 0.13      | -1.57              |
| GSU1167         | Conserved hypothetical protein                       | Hypothetical proteins | Conserved          | -1.03                             | 0.60      | -2.04              |
| GSU1642         | Conserved hypothetical protein                       | Hypothetical proteins | Conserved          | -2.11                             | 0.54      | -4.31              |
| GSU2193         | Conserved hypothetical protein                       | Hypothetical proteins | Conserved          | -1.24                             | 0.41      | -2.36              |
| GSU2347         | Conserved hypothetical protein                       | Hypothetical proteins | Conserved          | -1.29                             | 0.30      | -2.44              |
| GSU2437         | Conserved hypothetical protein                       | Hypothetical proteins | Conserved          | -1.01                             | 0.24      | -2.01              |
| GSU2788         | Conserved hypothetical protein                       | Hypothetical proteins | Conserved          | -1.58                             | 0.36      | -2.98              |
| GSU3139         | Conserved hypothetical protein                       | Hypothetical proteins | Conserved          | -1.29                             | 0.14      | -2.44              |

| <b>Locus ID</b> | <b>Common name</b>             | <b>Mainrole</b>       | <b>Subrole</b> | <b>Mean log<sub>2</sub> Ratio</b> | <b>SD</b> | <b>Fold Change</b> |
|-----------------|--------------------------------|-----------------------|----------------|-----------------------------------|-----------|--------------------|
| GSU3151         | Conserved hypothetical protein | Hypothetical proteins | Conserved      | -1.11                             | 0.34      | -2.16              |
| GSU3251         | Conserved hypothetical protein | Hypothetical proteins | Conserved      | -0.95                             | 0.20      | -1.93              |
| GSU3255         | Conserved hypothetical protein | Hypothetical proteins | Conserved      | -0.83                             | 0.27      | -1.78              |
| GSU3289         | Conserved hypothetical protein | Hypothetical proteins | Conserved      | -2.32                             | 0.64      | -5.01              |
| GSU0077         | Hypothetical protein           | Hypothetical protein  | Hypothetical   | -1.13                             | 0.23      | -2.18              |
| GSU0078         | Hypothetical protein           | Hypothetical protein  | Hypothetical   | -1.18                             | 0.38      | -2.26              |
| GSU0712         | Hypothetical protein           | Hypothetical protein  | Hypothetical   | -1.64                             | 0.60      | -3.11              |
| GSU0713         | Hypothetical protein           | Hypothetical protein  | Hypothetical   | -1.82                             | 0.29      | -3.54              |
| GSU0714         | Hypothetical protein           | Hypothetical protein  | Hypothetical   | -2.72                             | 0.72      | -6.58              |
| GSU0715         | Hypothetical protein           | Hypothetical protein  | Hypothetical   | -3.41                             | 0.96      | -10.60             |
| GSU0716         | Hypothetical protein           | Hypothetical protein  | Hypothetical   | -2.95                             | 0.67      | -7.75              |
| GSU0719         | Hypothetical protein           | Hypothetical protein  | Hypothetical   | -1.95                             | 0.38      | -3.87              |
| GSU0790         | Hypothetical protein           | Hypothetical protein  | Hypothetical   | -1.76                             | 0.62      | -3.39              |
| GSU0990         | Hypothetical protein           | Hypothetical protein  | Hypothetical   | -0.90                             | 0.21      | -1.87              |
| GSU1395         | Hypothetical protein           | Hypothetical protein  | Hypothetical   | -1.61                             | 0.75      | -3.05              |
| GSU1396         | Hypothetical protein           | Hypothetical protein  | Hypothetical   | -1.59                             | 0.48      | -3.01              |
| GSU1558         | Hypothetical protein           | Hypothetical protein  | Hypothetical   | -1.40                             | 0.50      | -2.65              |
| GSU1969         | Hypothetical protein           | Hypothetical protein  | Hypothetical   | -1.57                             | 0.46      | -2.98              |
| GSU1994         | Hypothetical protein           | Hypothetical protein  | Hypothetical   | -1.64                             | 0.77      | -3.13              |
| GSU2412         | Hypothetical protein           | Hypothetical protein  | Hypothetical   | -1.06                             | 0.32      | -2.08              |
| GSU2726         | Hypothetical protein           | Hypothetical protein  | Hypothetical   | -2.68                             | 0.62      | -6.39              |
| GSU2730         | Hypothetical protein           | Hypothetical protein  | Hypothetical   | -1.07                             | 0.28      | -2.09              |
| GSU2733         | Hypothetical protein           | Hypothetical protein  | Hypothetical   | -2.02                             | 0.42      | -4.06              |
| GSU2739         | Hypothetical protein           | Hypothetical protein  | Hypothetical   | -2.29                             | 0.37      | -4.90              |
| GSU2742         | Hypothetical protein           | Hypothetical protein  | Hypothetical   | -2.10                             | 0.44      | -4.28              |
| GSU3189         | Hypothetical protein           | Hypothetical protein  | Hypothetical   | -0.69                             | 0.26      | -1.61              |

| <b>Locus ID</b> | <b>Common name</b>                                  | <b>Mainrole</b>             | <b>Subrole</b>                                        | <b>Mean log<sub>2</sub> Ratio</b> | <b>SD</b>   | <b>Fold Change</b> |
|-----------------|-----------------------------------------------------|-----------------------------|-------------------------------------------------------|-----------------------------------|-------------|--------------------|
| GSU3341         | Hypothetical protein                                | Hypothetical protein        | Hypothetical                                          | -2.37                             | 0.34        | -5.18              |
| GSU3344         | Hypothetical protein                                | Hypothetical protein        | Hypothetical                                          | -1.56                             | 0.34        | -2.95              |
| GSU3351         | Hypothetical protein                                | Hypothetical protein        | Hypothetical                                          | -1.09                             | 0.44        | -2.13              |
| GSU0538         | Heat shock protein, Hsp20 family                    | Protein fate                | Protein folding and stabilization                     | -0.77                             | 0.21        | -1.70              |
| GSU0658         | Clpb protein                                        | Protein fate                | Degradation of proteins, peptides, and glycopeptides  | -0.93                             | 0.17        | -1.91              |
| GSU3140         | Peptidase, M1 family protein                        | Protein fate                | Degradation of proteins, peptides, and glycopeptides  | -1.43                             | 0.28        | -2.69              |
| GSU3193         | ATP-dependent protease La                           | Protein fate                | Degradation of proteins, peptides, and glycopeptides  | -1.50                             | 0.22        | -2.83              |
| GSU0079         | Transcriptional regulator, Cro/CI family            | Regulatory functions        | DNA interactions                                      | -1.61                             | 0.39        | -3.04              |
| GSU0700         | Sensory box/response regulator                      | Regulatory functions        | Small molecule interactions and Two-component systems | -2.42                             | 1.68        | -5.34              |
| GSU0789         | Response regulator                                  | Regulatory functions        | Protein interactions and Two-component systems        | -0.84                             | 0.42        | -1.79              |
| GSU0841         | Sigma-54 dependent DNA-binding response regulator   | Regulatory functions        | Protein interactions and Two-component systems        | -0.76                             | 0.14        | -1.70              |
| GSU1414         | Sensory box histidine kinase/response regulator     | Regulatory functions        | Small molecule interactions and Two-component systems | -0.97                             | 0.27        | -1.96              |
| <b>GSU2964</b>  | <b>Molybdenum transport regulatory protein mode</b> | <b>Regulatory functions</b> | <b>DNA interactions</b>                               | <b>-1.64</b>                      | <b>0.45</b> | <b>-3.11</b>       |
| GSU2444         | Sensor histidine kinase                             | Regulatory functions        | Protein interactions                                  | -1.10                             | 0.26        | -2.14              |
| GSU0718         | Sensory box histidine kinase/response regulator     | Signal transduction         | Two-component systems                                 | -2.51                             | 1.17        | -5.69              |
| GSU0842         | Sensory box histidine kinase/response regulator     | Signal transduction         | Two-component systems                                 | -2.00                             | 0.16        | -4.00              |
| GSU1119         | Sensor histidine kinase/response regulator          | Signal transduction         | Two-component systems                                 | -0.94                             | 0.16        | -1.92              |
| GSU1415         | Response regulator                                  | Signal transduction         | Two-component systems                                 | -1.33                             | 0.45        | -2.51              |
| GSU3138         | Sensor histidine kinase/response regulator          | Signal transduction         | Two-component systems                                 | -1.36                             | 0.42        | -2.57              |

| Locus ID       | Common name                                            | Mainrole                              | Subrole                             | Mean log <sub>2</sub> Ratio | SD          | Fold Change  |
|----------------|--------------------------------------------------------|---------------------------------------|-------------------------------------|-----------------------------|-------------|--------------|
| GSU0496        | Efflux transporter, RND family, MFP subunit            | Transport and binding proteins        | Unknown substrate                   | -0.84                       | 0.14        | -1.79        |
| GSU072         | Desulfoferrodoxin ferrous iron-binding domain          | Transport and binding proteins        | Cations and iron carrying compounds | -2.09                       | 0.77        | -4.27        |
| GSU0816        | ABC transporter, ATP-binding protein                   | Transport and binding proteins        | Unknown substrate                   | -1.26                       | 0.24        | -2.39        |
| GSU0844        | Potassium uptake protein, Trk family                   | Transport and binding proteins        | Cations and iron carrying compounds | -1.26                       | 0.20        | -2.40        |
| GSU1016        | Potassium uptake protein, Trk family                   | Transport and binding proteins        | Cations and iron carrying compounds | -0.97                       | 0.15        | -1.96        |
| GSU1307        | Ferritin                                               | Transport and binding proteins        | Cations and iron carrying compounds | -1.65                       | 0.36        | -3.13        |
| GSU2649        | Amino acid ABC transporter, amino acid-binding protein | Transport and binding proteins        | Amino acids, peptides and amines    | -3.17                       | 0.78        | -8.99        |
| GSU2650        | Amino acid ABC transporter, permease protein, putative | Transport and binding proteins        | Amino acids, peptides and amines    | -2.22                       | 0.76        | -4.66        |
| <b>GSU2964</b> | <b>Molybdenum transport regulatory protein mode</b>    | <b>Transport and binding proteins</b> | <b>Anions</b>                       | <b>-1.64</b>                | <b>0.45</b> | <b>-3.11</b> |
| GSU3346        | Potassium uptake protein, Kup system                   | Transport and binding proteins        | Cations and iron carrying compounds | -1.26                       | 0.20        | -2.39        |
| GSU0066        | Ahpc/Tsa family protein, selenocysteine-containing     | Unknown function                      | General                             | -1.47                       | 0.46        | -2.77        |
| GSU0217        | Nitroreductase family protein                          | Unknown function                      | Enzymes of unknown specificity      | -1.48                       | 0.43        | -2.79        |
| GSU0360        | Ompa domain protein                                    | Unknown function                      | General                             | -2.33                       | 1.41        | -5.03        |
| GSU0477        | Hydrolase, haloacid dehalogenase-like family           | Unknown function                      | Enzymes of unknown specificity      | -1.69                       | 1.04        | -3.22        |

| <b>Locus ID</b>     | <b>Common name</b>                                           | <b>Mainrole</b>  | <b>Subrole</b>                 | <b>Mean log<sub>2</sub> Ratio</b> | <b>SD</b> | <b>Fold Change</b> |
|---------------------|--------------------------------------------------------------|------------------|--------------------------------|-----------------------------------|-----------|--------------------|
| GSU0711             | Endonuclease/exonuclease/phosphatase family protein          | Unknown function | Enzymes of unknown specificity | -1.53                             | 0.34      | -2.89              |
| GSU0767             | Tia invasion determinant-related protein                     | Unknown function | General                        | -0.71                             | 0.20      | -1.64              |
| GSU0810             | Ompa domain protein                                          | Unknown function | General                        | -1.61                             | 0.42      | -3.04              |
| GSU0909             | Pyridine nucleotide-disulphide oxidoreductase family protein | Unknown function | Enzymes of unknown specificity | -1.67                             | 0.23      | -3.19              |
| GSU0972             | Atpase, AAA family                                           | Unknown function | General                        | -0.74                             | 0.19      | -1.67              |
| GSU0989             | NHL repeat domain protein                                    | Unknown function | General                        | -0.73                             | 0.17      | -1.66              |
| GSU1007             | GAF domain/HD domain protein                                 | Unknown function | General                        | -0.70                             | 0.14      | -1.62              |
| GSU1014             | Smr domain protein                                           | Unknown function | General                        | -0.75                             | 0.33      | -1.68              |
| GSU1394             | Laccase family protein                                       | Unknown function | General                        | -2.12                             | 0.68      | -4.34              |
| GSU1950             | Capk related-protein                                         | Unknown function | General                        | -0.78                             | 0.23      | -1.71              |
| GSU1968             | Nucleotidyltransferase family protein                        | Unknown function | Enzymes of unknown specificity | -1.03                             | 0.25      | -2.04              |
| GSU1974             | Degt/dnrj/eryc1/strs family protein                          | Unknown function | General                        | -1.10                             | 0.44      | -2.14              |
| GSU1982             | General secretion pathway protein-related protein            | Unknown function | General                        | -1.06                             | 0.35      | -2.09              |
| GSU1986             | Glycosyl transferase domain protein                          | Unknown function | General                        | -1.13                             | 0.68      | -2.19              |
| GSU1991             | CAAX amino terminal protease family protein                  | Unknown function | General                        | -0.57                             | 0.11      | -1.48              |
| GSU2436             | Dehydrogenase complex, E1 component, beta subunit            | Unknown function | Enzymes of unknown specificity | -1.25                             | 0.24      | -2.37              |
| GSU2443             | Dehydrogenase complex, E1 component, alpha subunit           | Unknown function | Enzymes of unknown specificity | -0.97                             | 0.23      | -1.97              |
| GSU3343             | Spovr-like family protein                                    | Unknown function | General                        | -1.92                             | 0.54      | -3.79              |
| <sup>a</sup> R00118 | Null                                                         | Null             | Null                           | -1.75                             | 0.55      | -3.35              |
|                     | a intergenic region                                          |                  |                                |                                   |           |                    |



Table S6. Reporters (amplicons representing genes and intergenic regions) whose expression was significantly increased (repressed by RpoS) in each biological replicate of the *G. sulfurreducens rpoS* mutant versus the wild type for cells grown with acetate as the electron donor and Fe(III) as electron acceptor. Results are sorted first by mainrole category, then in ascending order by Locus ID.

| <b>Locus ID</b> | <b>Common Name</b>                              | <b>Mainrole</b>       | <b>Subrole</b>                                                                      | <b>Mean log<sub>2</sub> Ratio</b> | <b>SD</b> | <b>Fold Change</b> |
|-----------------|-------------------------------------------------|-----------------------|-------------------------------------------------------------------------------------|-----------------------------------|-----------|--------------------|
| GSU0268         | Membrane protein, putative                      | Cell envelope         | Other                                                                               | 0.64                              | 0.15      | 1.56               |
| GSU1489         | Membrane protein, putative                      | Cell envelope         | Other                                                                               | 0.70                              | 0.06      | 1.63               |
| GSU1499         | Membrane protein, putative                      | Cell envelope         | Other                                                                               | 0.98                              | 0.17      | 1.98               |
| GSU1783         | Type IV pilus biogenesis protein pilB, putative | Cell envelope         | Surface structures                                                                  | 0.62                              | 0.09      | 1.54               |
| GSU1789         | Glycosyl transferase, group 2 family protein    | Cell envelope         | Biosynthesis and degradation of surface polysaccharides and lipopolysaccharides     | 0.99                              | 0.27      | 1.98               |
| GSU1996         | Cytochrome c family protein                     | Energy metabolism     | Electron transport                                                                  | 0.66                              | 0.18      | 1.58               |
| GSU0943         | Hypothetical protein                            | Hypothetical proteins | Hypothetical                                                                        | 0.64                              | 0.20      | 1.55               |
| GSU1011         | Hypothetical protein                            | Hypothetical proteins | Hypothetical                                                                        | 0.76                              | 0.15      | 1.69               |
| GSU1652         | Hypothetical protein                            | Hypothetical proteins | Hypothetical                                                                        | 0.59                              | 0.15      | 1.51               |
| GSU2747         | Hypothetical protein                            | Hypothetical proteins | Hypothetical                                                                        | 1.28                              | 0.52      | 2.43               |
| GSU3402         | Hypothetical protein                            | Hypothetical proteins | Hypothetical                                                                        | 2.30                              | 0.38      | 4.91               |
| GSU3403         | Hypothetical protein                            | Hypothetical proteins | Hypothetical                                                                        | 2.75                              | 0.19      | 6.75               |
| GSU1793         | Trigger factor                                  | Protein fate          | Protein folding and stabilization and Protein and peptide secretion and trafficking | 0.90                              | 0.25      | 1.87               |
| GSU2839         | Ribosomal protein L30                           | Protein synthesis     | Ribosomal proteins: synthesis and modification                                      | 0.62                              | 0.16      | 1.54               |

| <b>Locus ID</b>     | <b>Common Name</b>                                                                          | <b>Mainrole</b>                | <b>Subrole</b>                   | <b>Mean<br/>log<sub>2</sub><br/>Ratio</b> | <b>SD</b> | <b>Fold<br/>Change</b> |
|---------------------|---------------------------------------------------------------------------------------------|--------------------------------|----------------------------------|-------------------------------------------|-----------|------------------------|
| GSU1630             | Sensory box histidine kinase                                                                | Regulatory functions           | Protein interactions             | 0.58                                      | 0.09      | 1.50                   |
| GSU1795             | Ribonuclease PH                                                                             | Transcription                  | RNA processing                   | 0.96                                      | 0.22      | 1.94                   |
| GSU3401             | Branched-chain amino acid ABC transporter, periplasmic amino acid-binding protein, putative | Transport and binding proteins | Amino acids, peptides and amines | 3.00                                      | 0.22      | 8.02                   |
| GSU3404             | Amino acid ABC transporter, ATP-binding protein                                             | Transport and binding proteins | Amino acids, peptides and amines | 2.32                                      | 0.33      | 4.99                   |
| GSU3405             | Amino acid ABC transporter, permease protein                                                | Transport and binding proteins | Amino acids, peptides and amines | 0.98                                      | 0.24      | 1.97                   |
| GSU1736             | ACT domain protein NHL repeat domain                                                        | Unknown function               | General                          | 0.62                                      | 0.17      | 1.54                   |
| GSU1788             | protein                                                                                     | Unknown function               | General                          | 0.97                                      | 0.15      | 1.96                   |
| GSU1794             | HAM1 protein                                                                                | Unknown function               | General                          | 0.87                                      | 0.16      | 1.83                   |
| GSU1796             | DHH family protein                                                                          | Unknown function               | General                          | 1.58                                      | 0.60      | 2.99                   |
| GSU2516             | Rhodanese-like domain protein                                                               | Unknown function               | General                          | 1.03                                      | 0.18      | 2.04                   |
| <sup>a</sup> R02992 | Null                                                                                        |                                |                                  | 0.76                                      | 0.18      | 1.69                   |

<sup>a</sup> Intergenic region

Table S7. Significant GO terms and TIGR biological role categories from the EASE analysis of down-regulated reporters during growth with Fe(III) as electron acceptor

| <b><u>System</u></b>  | <b><u>Gene Category</u></b>                 | <b><u>Probability</u></b> |
|-----------------------|---------------------------------------------|---------------------------|
| GO Biological Process | Electron transport                          | 4.2 E-07                  |
| TIGR Role             | Energy metabolism, electron transport       | 5.6 E-05                  |
| GO Biological Process | Tricarboxylic acid (TCA) cycle              | 1.3 E-04                  |
| TIGR Role             | Energy metabolism, TCA cycle                | 1.9 E-04                  |
| GO Molecular Function | Electron transporter activity               | 3.4 E-04                  |
| GO Molecular Function | Succinate-CoA ligase activity               | 1.6 E-03                  |
| GO Molecular Function | Succinate-CoA ligase (ADP-forming) activity | 1.6 E-03                  |
| GO Molecular Function | Cytochrome c peroxidase activity            | 1.6 E-03                  |
| GO Biological Process | Main pathways of carbohydrate metabolism    | 2.5 E-03                  |
| GO Molecular Function | Two-component response regulator activity   | 3.8 E-03                  |
| GO Molecular Function | Acid-thiol ligase activity                  | 4.6 E-03                  |
| GO Molecular Function | CoA-ligase activity                         | 4.6 E-03                  |
| GO Molecular Function | Aconitate hydratase activity                | 4.6 E-03                  |
| GO Molecular Function | Potassium ion transporter activity          | 5.9 E-03                  |
| GO Biological Process | Potassium ion transport                     | 5.9 E-03                  |
| GO Molecular Function | Ligase activity/forming carbon-sulfur bonds | 8.9 E-03                  |

Table S8. Significant GO terms and TIGR biological role categories from the EASE analysis of up-regulated reporters during growth with Fe(III) as electron acceptor

| <b><u>System</u></b>  | <b><u>Gene Category</u></b>                                      | <b><u>Probability</u></b> |
|-----------------------|------------------------------------------------------------------|---------------------------|
| GO Molecular Function | Amino acid transporter activity                                  | 4.7 E-04                  |
| GO Molecular Function | Amine/polyamine transporter activity                             | 5.3 E-04                  |
| GO Biological Process | Amino acid transport                                             | 5.9 E-04                  |
| GO Biological Process | Amine/polyamine transport                                        | 6.6 E-04                  |
| GO Molecular Function | Organic Acid transporter activity                                | 9.0 E-04                  |
| GO Molecular Function | Carboxylic acid transporter activity                             | 9.0 E-04                  |
| TIGR Role             | Transport and binding proteins, amino acids, peptides and amines | 9.5 E-04                  |
| GO Biological Process | Carboxylic acid transport                                        | 9.9 E-04                  |
| GO Biological Process | Organic acid transport                                           | 9.9 E-04                  |
